# Supplementary material
Source: publisher site journal article supplement (https://www.dovepress.com/article/313373)
Supplement: Supplementary file 1 [file get_supplementary_file.php]

**Supplementary Material**

**Supplemental Table 1:** COVID-19 in Saudi Arabia during the study period.

| **Date** | **Decision** | **Instructions** | **Cases** | **Deaths** |
| --- | --- | --- | --- | --- |
| **25th of January 2020** | Evacuate all Saudi citizens from China. | Applying preventive precautions in all flights coming from China. | 0 | 0 |
| **6th of February 2020** | Suspend travel to China | NA | 0 | 0 |
| **4th of March 2020** | Suspend Omrah | NA | 6 | 0 |
| **8th of March 2020** | Suspend education | To be continued virtually for most schools who have the abilities. | 15 | 0 |
| **13th of March 2020** | Suspend all public activities | All family meetings and gatherings like weddings. | 25 | 0 |
| **15-17th of March 2020** | Suspend all international flights, then suspend physical attendance in the government sector, close all malls, restaurants, and cafes, and suspend praying in mosques**.** | NA | 175 | 0 |
| **21st of March 2020** | Suspend national flights, trains, and public transportation. | Public transportation including taxis, and buses. | 392 | 0 |
| **23rd, 26th of March 2020** | Start quarantine from 7 pm to 6 am for 21 days, then it is increased to be from 3 pm to 6 am. | Not allowing entry to and exit from Riyadh, Makkah, and Almadina. | 1012 | 3 |
| **30th of March 2020** | Every COVID-19 patient will be treated without fees. | This includes all citizens, residents, and illegal residents. | 1453 | 8 |
| **2nd, 6th of April 2020** | Start All day quarantine in Makkah and Almadina, and then to be including Riyadh, Dammam, and Tabuk. | NA | 2523 | 38 |
| **21st of April 2020** | In Ramadan, quarantine hours are adjusted to be from 5 pm to 9 am. | NA | 11631 | 109 |
| **26th of April 2020** | Saudi Arabia signed a contract with China for about 995 million to do 9 million COVID-19 tests. | NA | 17522 | 139 |
| **28th, 31st of May 2020** | Start allowing for some economics and commercial activities. And transport between cities in a non-quarantine period. After that they allowed for national flights, praying in mosques, and traveling within Saudi Arabia. | NA | 83384 | 480 |
| **8th of May 2020** | We start our data collection | NA | 35432 | 229 |
| **21st of June 2020** | Back to normal activities in all cities in Saudi Arabia. | With restrictions of prevention precautions and social distance. | 154233 | 1230 |
| **22nd of June 2020** | There will be a Hajj of 1441 with a limited number of pilgrims who are in Saudi Arabia. | NA | 157612 | 1267 |
| **29th of June 2020** | We Finished data collection | NA | 182493 | 1551 |
| **15th of August 2020** | The Ministry of Education announced that education will be virtual for the first 7 weeks then they will reassess if it is going to continue that way or not. | Teachers and students can use the Madrasty platform | 295902 | 3338 |
| **8th of October 2020** | The Ministry of Education announced that education will continue to be virtual for the rest of the semester. | NA | 337711 | 4947 |
| **10th of December 2020** | S-FDA announced approval for registration of (Pfizer-BioNTech COVID-19 Vaccine) |  | 359274 | 6002 |
| **15th of December 2020** | MOH announced that registration for COVID-19 vaccination has begun. | 1. For both Saudi citizens and residents. 2. Registration using Sehhaty mobile app. a. [Android](https://play.google.com/store/apps/details?id=com.lean.sehhaty&hl=en): b. [iOS](https://apps.apple.com/sa/app/%D8%B5%D8%AD%D8%AA%D9%8Asehhaty/id1459266578): | 360013 | 6059 |
| **20th of December 2020** | Suspend of all international round-trip flights for a week, and it is expected to last for another week. Also, close all land entrance. | In coordination between the Ministry of Health and Ministry of Transport. | 360848 | 6112 |

**Supplemental Table 2: Survey questionnaire**

1. **Sociodemographic data**

1.How often do you go out weekly before the coronavirus pandemic outside working hours?

- None
- Once per week
- Two to three times a week
- Four times or more

2. I consider myself a person who?

- Has many friends
- Has one or two friends
- Has no friends

3. I consider myself a person who?

- loves and waits for social events
- Neutral
- gets bored of social occasions
- Gets bored of social events and does not go there
- hates social events and does not go there

4. I have good information about coronavirus and its ways of spreading?

- Highly agree
- Agree
- Neutral
- Disagree
- Highly disagree

5. I feel very afraid because there is no approved drug to treat coronavirus COVID-19 ?

- Highly agree
- Agree
- Neutral
- Disagree
- Highly disagree

6.Coronavirus news on social media increases my anxiety and fear?

- Highly agree
- Agree
- Neutral
- Disagree

7. Currently I am ?

- Not subjected to the country duo to the curfew lift
- Subjected to the quarantine restrictions (at my home) because of the curfew law
- Subjected to quarantine restrictions (at my home) because of coronavirus suspicion
- Subjected to quarantine restrictions (at my home) because of coronavirus infection
- subjected to isolation restrictions (at my home) because of arrival from abroad
- Subjected to isolation restrictions (at the quarantine facility as hospital or hotel) because of coronavirus suspicion
- Subjected to isolation restrictions (at the quarantine facility as hospital or hotel) because of coronavirus infection
- ‏Subjected to isolation restrictions (at the quarantine facility as hospital or hotel) because of arrival from abroad

8. Isolation Vs None ?

- Isolation
- None

9. Do you have Coronavirus COVID-19 ?

- Yes
- No
- I don’t know

10. Do you suffer from COVID-19 symptoms?

- Yes
- No

11. Since when you are in quarantine or isolation facility (days) ?

__________________________________

12. Curfew hours during the past month?

__________________________________

13. Curfew hours during the past month?

- Partial curfew 6 am – 3 pm
- Partial curfew 6 am – 8 pm. Penalties for not wearing face mask
- No curfew, Penalties for not wearing face mask, refuse to be checked for temperature when entering public or private sector, fail to adhere to social distancing rules

14. I am currently in the quarantine or isolation facility due to?

- Country curfew
- Coronavirus COVID-19 infection
- Coronavirus COVID 19 suspicion
- I am not at quarantine or isolation

15. Are you pregnant?

- Yes
- No
- Not applicable

16. Are your sleep habits affected by special occasions as Ramadan or vacations?

- Yes
- No

17. Do you suffer from a chronic disease?

- Yes
- No
- I don’t know

18. Do you take any psychotropics or sleep medicine?

- Yes
- No

1. **Personal Information**

1.Gender:

- Male
- Female

2. Age

____________________

3. Marital Status:

- Single
- Married
- Divorced/widowed /separated

4. Do you work in a health sector

- Yes
- No

5. Do you work shifts?

- Yes
- No

6. Number of children

- 0
- 1
- 2
- 3
- 4 or more

7. How many members of your family live with you at home (including you)

- One to two persons
- Three to five persons
- More than five persons

8.Nationality:

- Saudi
- Non-Saudi

9. Job Status:

- I don’t work
- Employee
- Self employed
- Student

10. Education Level

- Middle school or lower
- High school
- Diploma
- Bachelor's degree
- Master's degree or higher

11. The country where I live

- Saudi Arabia
- Other

12. Work venue during the coronavirus pandemic

- I go to my workplace
- Home
- I don’t work
